# Supplementary material for: Metallic cyanoacetylides of copper, silver and gold: generation and structural characterization
Source: Royal Society of Chemistry journal article supplement (doi:10.1039/c6cp04474c), 2016-01-01
Supplement: c6cp04474c1.pdf [file c6cp04474c1.pdf]

Electronic Supplementary Information

for

**Metallic Cyanoacetylides of Copper, Silver and  
Gold: Generation and Structural Characterization**

*Carlos Cabezas, Carmen Barrientos, Antonio Largo, Jean-Claude Guillemin and José Luis*

*Alonso*

**Figure S1.** Geometrical parameters obtained at the MP2/aug-cc-pVTZ+PP level for the bent structure of AuNCCC. Distances are given in Ångstroms and angles in degrees.

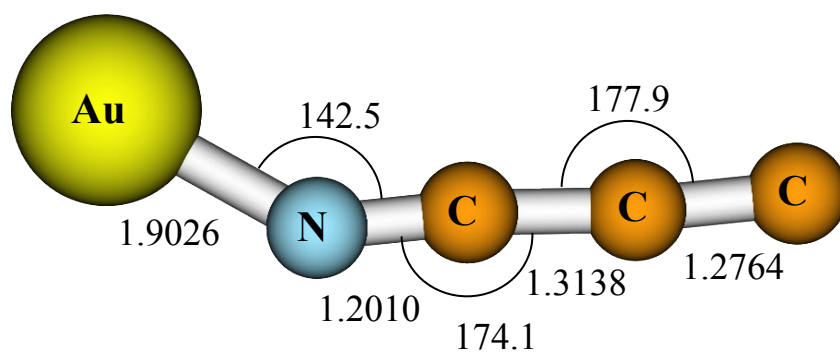

Rotational constants (MHz): A = 67404.7; B = 851.6; C = 841.0

**Figure S2.** Contour maps of the Laplacian distribution of the electron density for the MCCCN and MNCCC isomers. Red dashed lines indicate regions of electronic charge concentration ( $\nabla^2\rho(r) < 0$ ), and blue continuous lines denote regions of electronic charge depletion ( $\nabla^2\rho(r) > 0$ ). Small red spheres represent bond critical points

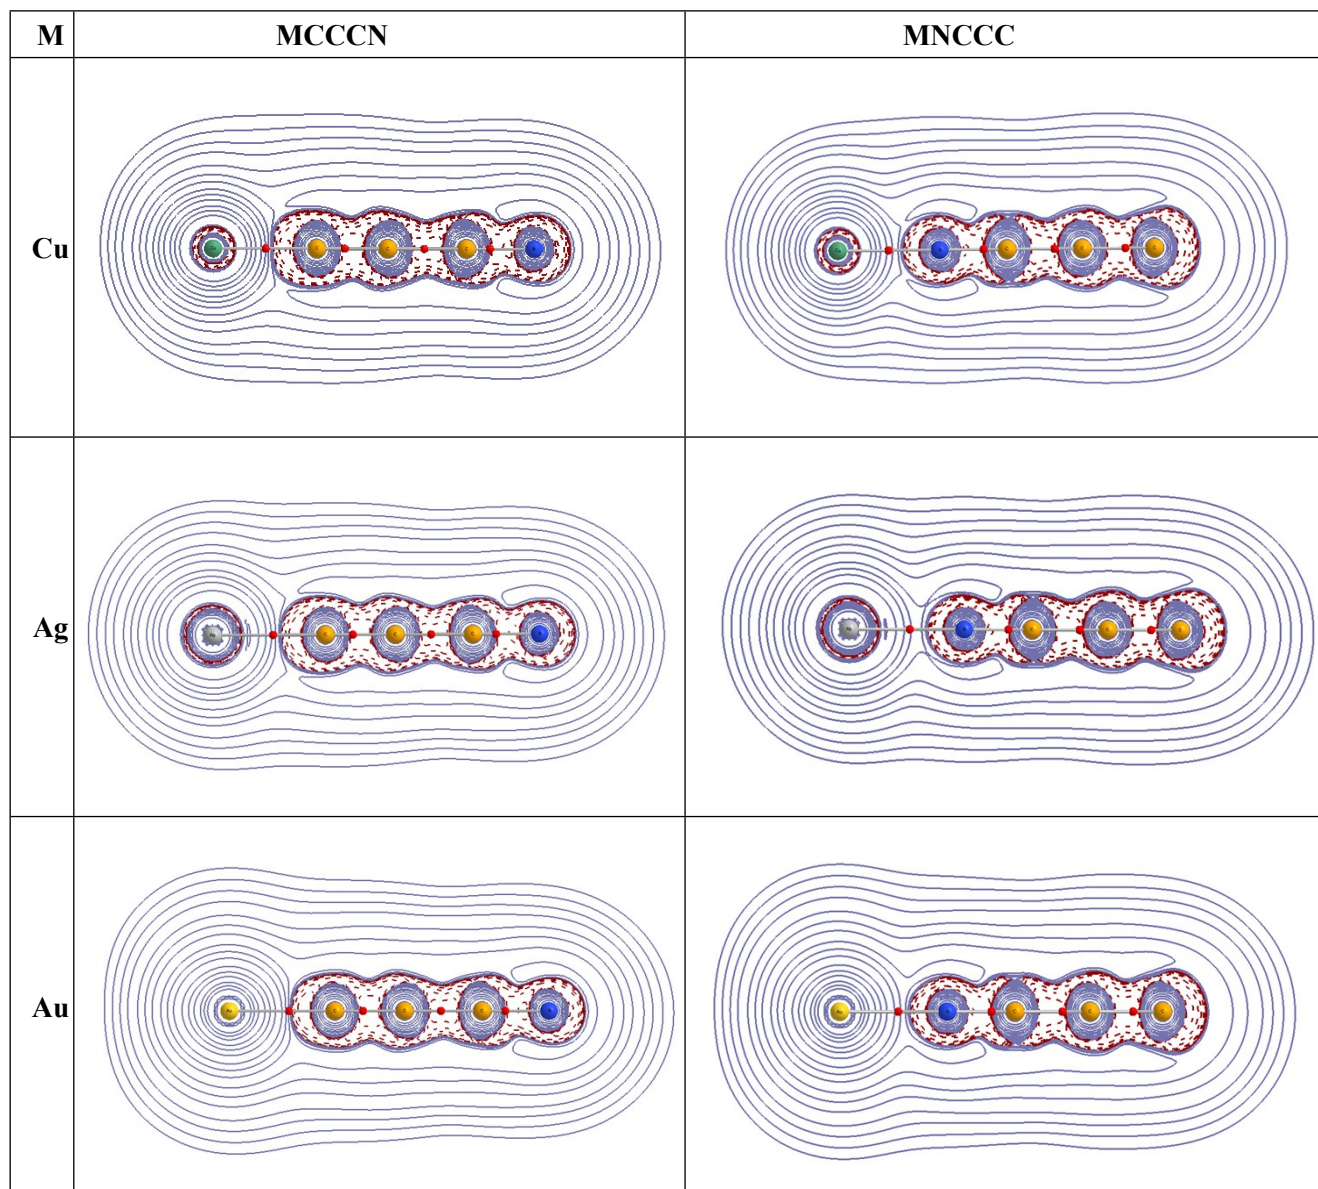

**Table S1.** Measured frequencies and residuals (in MHz) for the nuclear quadrupole coupling hyperfine components of  $^{63}\text{CuCCCN}$ .

| J'  | J'' | F' <sub>1</sub> | F'' <sub>1</sub> | F'         | F''      | $\nu_{\text{obs.}}$ | $\nu_{\text{obs.}} - \nu_{\text{cal.}}$ |
|-----|-----|-----------------|------------------|------------|----------|---------------------|-----------------------------------------|
| 2   | 1   | 1.5             | 1.5              | 1.5        | 1.5      | 4020.15931          | 0.00136                                 |
|     |     | 1.5             | 1.5              | 0.5        | 1.5      | 4020.46279          | 0.00144                                 |
|     |     | 1.5             | 1.5              | 2.5        | 2.5      | 4021.36651          | 0.00100                                 |
|     |     | 1.5             | 1.5              | 1.5        | 0.5      | 4021.81008          | 0.00236                                 |
|     |     | 2.5             | 1.5              | 2.5        | 1.5      | 4024.00925          | 0.00264                                 |
|     |     | 2.5             | 1.5              | 1.5        | 1.5      | 4024.66140          | 0.00209                                 |
|     |     | 3.5             | 2.5              | 2.5        | 1.5      | 4024.82305          | 0.00238                                 |
|     |     | 3.5             | 2.5              | 3.5        | 2.5      | 4024.89298          | 0.00236                                 |
|     |     | 3.5             | 2.5              | 4.5        | 3.5      | 4025.13962          | 0.00119                                 |
|     |     | 2.5             | 1.5              | 3.5        | 2.5      | 4025.29901          | 0.00288                                 |
|     |     | 0.5             | 0.5              | 0.5        | 0.5      | 4025.35099          | -0.00150                                |
|     |     | 0.5             | 0.5              | 1.5        | 0.5      | 4025.48506          | 0.00112                                 |
|     |     | 0.5             | 0.5              | 0.5        | 1.5      | 4025.54958          | 0.00195                                 |
|     |     | 0.5             | 0.5              | 1.5        | 1.5      | 4025.68126          | 0.00218                                 |
|     |     | 1.5             | 2.5              | 2.5        | 1.5      | 4026.14535          | 0.00245                                 |
|     |     | 2.5             | 1.5              | 1.5        | 0.5      | 4026.31000          | 0.00092                                 |
|     |     | 3.5             | 0.5              | 2.5        | 1.5      | 4030.01772          | 0.00178                                 |
|     |     | 2.5             | 2.5              | 3.5        | 3.5      | 4030.45826          | 0.00076                                 |
|     |     | 1.5             | 0.5              | 1.5        | 0.5      | 4030.90452          | 0.00199                                 |
|     |     | 2.5             | 2.5              | 2.5        | 2.5      | 4031.04658          | 0.00068                                 |
| 3   | 2   | 1.5             | 0.5              | 2.5        | 1.5      | 4031.34056          | 0.00239                                 |
|     |     | 3.5             | 2.5              | 3.5        | 2.5      | 6037.70176          | 0.00060                                 |
|     |     | 4.5             | 3.5              | 4.5        | 3.5      | 6037.95566          | 0.00075                                 |
|     |     | 4.5             | 3.5              | 5.5        | 4.5      | 6038.06743          | 0.00119                                 |
|     |     | 3.5             | 2.5              | 4.5        | 3.5      | 6038.12795          | 0.00126                                 |
|     |     | 3.5             | 2.5              | 2.5        | 1.5      | 6038.15966          | 0.00342                                 |
|     |     | 4.5             | 3.5              | 3.5        | 2.5      | 6038.19728          | 0.00210                                 |
| 4   | 3   | 4.5             | 3.5              | 4.5        | 3.5      | 8050.74166          | -0.00311                                |
|     |     | 5.5             | 4.5              | 5.5        | 4.5      | 8050.83673          | -0.00294                                |
|     |     | 5.5             | 4.5              | 4.5        | 3.5      | 8050.89875          | -0.00135                                |
|     |     | 4.5             | 3.5              | 5.5        | 4.5      | 8050.92701          | -0.00353                                |
|     |     | 3.5             | 2.5              | 3.5        | 2.5      | 8051.31578          | -0.00222                                |
|     |     | 2.5             | 1.5              | 2.5        | 1.5      | 8051.35634          | -0.00226                                |
|     |     | 3.5             | 2.5              | 4.5        | 3.5      | 8051.53611          | -0.00300                                |
|     |     | 3.5             | 2.5              | 2.5        | 1.5      | 8051.55281          | -0.00263                                |
| 2.5 | 1.5 | 3.5             | 2.5              | 8051.60586 | -0.00316 |                     |                                         |

**Table S2.** Measured frequencies and residuals (in MHz) for the nuclear quadrupole coupling hyperfine components of  $^{65}\text{CuCCCN}$ .

| $J'$ | $J''$ | $F'_1$ | $F''_1$ | $F'$ | $F''$ | $\nu_{\text{obs.}}$ | $\nu_{\text{obs.}} - \nu_{\text{cal.}}$ |
|------|-------|--------|---------|------|-------|---------------------|-----------------------------------------|
| 2    | 1     | 2.5    | 2.5     | 1.5  | 1.5   | 3980.29978          | 0.00113                                 |
|      |       | 3.5    | 2.5     | 2.5  | 1.5   | 3981.09002          | 0.00098                                 |
|      |       | 3.5    | 3.5     | 2.5  | 2.5   | 3981.18809          | 0.00129                                 |
|      |       | 3.5    | 4.5     | 2.5  | 3.5   | 3981.43499          | 0.00220                                 |
|      |       | 2.5    | 3.5     | 1.5  | 2.5   | 3981.59012          | 0.00127                                 |
| 3    | 2     | 3.5    | 3.5     | 2.5  | 2.5   | 5972.11233          | 0.00074                                 |
|      |       | 4.5    | 4.5     | 3.5  | 3.5   | 5972.36547          | 0.00153                                 |
|      |       | 4.5    | 5.5     | 3.5  | 4.5   | 5972.47704          | 0.00269                                 |
|      |       | 3.5    | 4.5     | 2.5  | 3.5   | 5972.53681          | 0.00284                                 |
|      |       | 4.5    | 3.5     | 3.5  | 2.5   | 5972.62303          | 0.00198                                 |
|      |       | 3.5    | 2.5     | 2.5  | 2.5   | 5973.21119          | 0.00084                                 |
|      |       | 2.5    | 3.5     | 1.5  | 2.5   | 5973.63758          | 0.00266                                 |
| 4    | 3     | 1.5    | 2.5     | 0.5  | 1.5   | 5973.85015          | 0.00303                                 |
|      |       | 4.5    | 4.5     | 3.5  | 3.5   | 7963.27920          | -0.00189                                |
|      |       | 5.5    | 5.5     | 4.5  | 4.5   | 7963.36814          | -0.00247                                |
|      |       | 5.5    | 4.5     | 4.5  | 3.5   | 7963.43214          | -0.00277                                |
|      |       | 4.5    | 5.5     | 3.5  | 4.5   | 7963.45817          | -0.00236                                |
|      |       | 3.5    | 3.5     | 2.5  | 2.5   | 7963.80080          | -0.00151                                |
|      |       | 2.5    | 2.5     | 1.5  | 1.5   | 7963.84181          | -0.00185                                |
|      |       | 2.5    | 1.5     | 1.5  | 0.5   | 7963.89431          | -0.00103                                |
|      |       | 3.5    | 4.5     | 2.5  | 3.5   | 7964.01075          | -0.00069                                |
|      |       | 2.5    | 3.5     | 1.5  | 2.5   | 7964.09106          | -0.00110                                |

**Table S3.** Measured frequencies and residuals (in MHz) for the nuclear quadrupole coupling hyperfine components of  $^{107}\text{AgCCCN}$ .

| $J'$ | $J''$ | $F'$ | $F''$ | $\nu_{\text{obs.}}$ | $\nu_{\text{obs.}} - \nu_{\text{cal.}}$ |
|------|-------|------|-------|---------------------|-----------------------------------------|
| 2    | 1     | 2    | 1     | 3135.61171          | -0.00099                                |
|      |       | 3    | 2     | 3135.69994          | -0.00021                                |
| 3    | 2     | 2    | 1     | 4703.21351          | 0.00000                                 |
|      |       | 3    | 2     | 4703.41725          | -0.00026                                |
|      |       | 4    | 3     | 4703.46585          | -0.00024                                |
| 4    | 3     | 3    | 2     | 6271.13337          | 0.00036                                 |
|      |       | 4    | 3     | 6271.22124          | 0.00079                                 |
|      |       | 5    | 4     | 6271.25228          | 0.00091                                 |
| 5    | 4     | 4    | 3     | 7838.97155          | -0.00079                                |
|      |       | 5    | 4     | 7839.02106          | 0.00014                                 |
|      |       | 6    | 5     | 7839.04210          | -0.00022                                |

**Table S4.** Measured frequencies and residuals (in MHz) for the nuclear quadrupole coupling hyperfine components of  $^{109}\text{AgCCCN}$ .

| $J'$ | $J''$ | $F'$ | $F''$ | $\nu_{\text{obs.}}$ | $\nu_{\text{obs.}} - \nu_{\text{cal.}}$ |
|------|-------|------|-------|---------------------|-----------------------------------------|
| 2    | 1     | 2    | 1     | 3120.17763          | 0.00007                                 |
|      |       | 3    | 2     | 3120.26521          | 0.00040                                 |
| 3    | 2     | 2    | 1     | 4680.06176          | 0.00050                                 |
|      |       | 3    | 2     | 4680.26385          | -0.00098                                |
|      |       | 4    | 3     | 4680.31349          | 0.00019                                 |
| 4    | 3     | 3    | 2     | 6240.26284          | -0.00020                                |
|      |       | 4    | 3     | 6240.35028          | -0.00001                                |
|      |       | 5    | 4     | 6240.38118          | 0.00004                                 |
| 5    | 4     | 4    | 3     | 7800.38389          | -0.00097                                |
|      |       | 5    | 4     | 7800.43482          | 0.00148                                 |
|      |       | 6    | 5     | 7800.45430          | -0.00039                                |

**Table S5.** Measured frequencies and residuals (in MHz) for the nuclear quadrupole coupling hyperfine components of  $^{197}\text{AuCCCN}$ .

| J'  | J'' | F' <sub>1</sub> | F'' <sub>1</sub> | F'         | F''     | $\nu_{\text{obs.}}$ | $\nu_{\text{obs.}} - \nu_{\text{cal.}}$ |
|-----|-----|-----------------|------------------|------------|---------|---------------------|-----------------------------------------|
| 2   | 1   | 3.5             | 2.5              | 3.5        | 2.5     | 2897.73394          | -0.00018                                |
|     |     | 3.5             | 2.5              | 2.5        | 1.5     | 2897.79371          | 0.00019                                 |
|     |     | 3.5             | 2.5              | 4.5        | 3.5     | 2897.99412          | 0.00047                                 |
| 3   | 2   | 3.5             | 2.5              | 3.5        | 2.5     | 4347.25679          | 0.00000                                 |
|     |     | 4.5             | 3.5              | 4.5        | 3.5     | 4347.51576          | 0.00034                                 |
|     |     | 4.5             | 3.5              | 5.5        | 4.5     | 4347.63294          | 0.00021                                 |
|     |     | 4.5             | 3.5              | 3.5        | 2.5     | 4347.67957          | 0.00047                                 |
|     |     | 3.5             | 2.5              | 4.5        | 3.5     | 4347.69957          | 0.00021                                 |
|     |     | 3.5             | 2.5              | 2.5        | 1.5     | 4347.75014          | -0.00004                                |
|     |     | 2.5             | 1.5              | 3.5        | 2.5     | 4349.87919          | -0.00005                                |
|     |     | 1.5             | 0.5              | 2.5        | 1.5     | 4349.99278          | 0.00030                                 |
| 4   | 3   | 2.5             | 1.5              | 1.5        | 0.5     | 4350.20599          | -0.00040                                |
|     |     | 3.5             | 3.5              | 3.5        | 3.5     | 5793.71245          | 0.00050                                 |
|     |     | 3.5             | 3.5              | 4.5        | 4.5     | 5793.87118          | -0.00085                                |
|     |     | 3.5             | 3.5              | 2.5        | 2.5     | 5793.91658          | -0.00068                                |
|     |     | 4.5             | 3.5              | 4.5        | 3.5     | 5796.93079          | -0.00009                                |
|     |     | 5.5             | 4.5              | 5.5        | 4.5     | 5797.04057          | 0.00017                                 |
|     |     | 5.5             | 4.5              | 4.5        | 3.5     | 5797.08627          | 0.00059                                 |
|     |     | 4.5             | 3.5              | 3.5        | 2.5     | 5797.10559          | 0.00025                                 |
|     |     | 4.5             | 3.5              | 5.5        | 4.5     | 5797.13905          | 0.00017                                 |
|     |     | 3.5             | 2.5              | 3.5        | 2.5     | 5797.92081          | 0.00032                                 |
|     |     | 2.5             | 1.5              | 2.5        | 1.5     | 5797.96236          | 0.00038                                 |
|     |     | 2.5             | 1.5              | 1.5        | 0.5     | 5798.03104          | -0.00031                                |
|     |     | 3.5             | 2.5              | 2.5        | 1.5     | 5798.18409          | -0.00128                                |
|     |     | 3.5             | 2.5              | 4.5        | 3.5     | 5798.19051          | 0.00028                                 |
| 2.5 | 1.5 | 3.5             | 2.5              | 5798.22602 | 0.00000 |                     |                                         |
| 5   | 4   | 5.5             | 4.5              | 5.5        | 4.5     | 7246.42065          | 0.00075                                 |
|     |     | 6.5             | 5.5              | 5.5        | 4.5     | 7246.49106          | -0.00004                                |
|     |     | 5.5             | 4.5              | 4.5        | 3.5     | 7246.49484          | 0.00053                                 |
|     |     | 4.5             | 3.5              | 4.5        | 3.5     | 7247.01431          | -0.00026                                |
|     |     | 3.5             | 2.5              | 3.5        | 2.5     | 7247.04482          | -0.00072                                |
|     |     | 3.5             | 2.5              | 2.5        | 1.5     | 7247.06058          | 0.00020                                 |
|     |     | 4.5             | 3.5              | 3.5        | 2.5     | 7247.12257          | -0.00052                                |
|     |     | 4.5             | 3.5              | 5.5        | 4.5     | 7247.15272          | -0.00060                                |
| 6   | 5   | 3.5             | 2.5              | 4.5        | 3.5     | 7247.17246          | -0.00058                                |
|     |     | 6.5             | 5.5              | 5.5        | 4.5     | 8695.87030          | 0.00085                                 |
|     |     | 5.5             | 4.5              | 5.5        | 4.5     | 8696.23236          | -0.00124                                |
|     |     | 4.5             | 3.5              | 4.5        | 3.5     | 8696.25296          | -0.00046                                |
|     |     | 5.5             | 4.5              | 4.5        | 3.5     | 8696.28676          | 0.00078                                 |
|     |     | 4.5             | 3.5              | 5.5        | 4.5     | 8696.32741          | 0.00083                                 |
